# Supplementary material for: Whole blood stabilization for the microfluidic isolation and molecular characterization of circulating tumor cells
Source: PubMed Central journal article supplement (PMC5700979; doi:10.1038/s41467-017-01705-y), 2017-11-23
Supplement: 41467_2017_1705_MOESM1_ESM.pdf [file 41467_2017_1705_MOESM1_ESM.pdf]

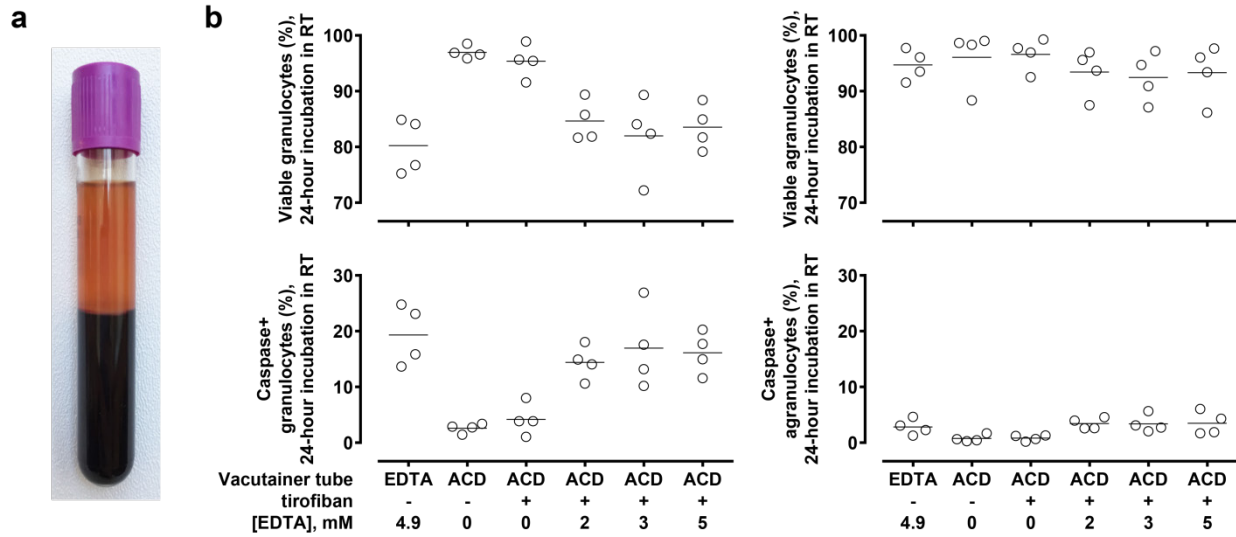

**Supplementary Figure 1.** Effects of EDTA and ACD anticoagulants on blood storage. **(a)** EDTA vacutainers (4.9 mM EDTA in 10 mL of blood) induce hemolysis after overnight storage in room temperature. **(b)** Viability of leukocytes quantified by imaging flow cytometry (as in Fig. 1). Blood was drawn into EDTA vacutainers, or ACD vacutainers with or without the addition of tirofiban ( $0.5 \mu\text{g mL}^{-1}$ ) and/or EDTA (2-5 mM), and stored for 24 hours in room temperature (RT). All conditions that contained EDTA resulted in significantly lower granulocyte viability and higher rate of apoptosis than ACD or ACD with tirofiban ( $p < 0.05$ , pair-wise comparisons using one-way ANOVA with Tukey's posttest). Agranulocytes were insensitive to EDTA.

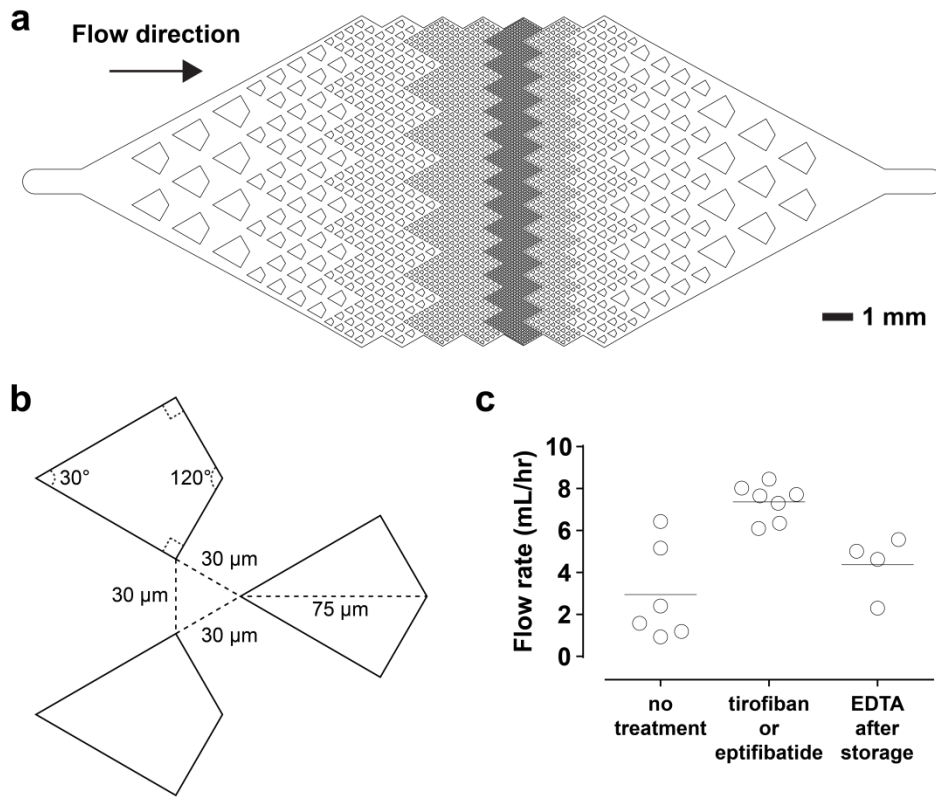

**Supplementary Figure 2.** Inhibition of glycoprotein IIb/IIIa is necessary and sufficient for clog-free microfluidic processing of stored blood. (a) A microfluidic filter device that contains kite-shaped microposts was used to assess clogging. The smallest features and gap sizes of this device is shown in (b). The height of the device is 50  $\mu\text{m}$ . (c) Blood flow rate was used to quantify microfluidic clogging. ACD-anticoagulated blood was stored in 4  $^{\circ}\text{C}$  for 48-72 hours without any treatment, in the presence of tirofiban ( $0.5 \mu\text{g mL}^{-1}$ ) or eptifibatide ( $20 \mu\text{g mL}^{-1}$ ), or stored without treatment but supplemented with EDTA (4.7-5.7 mM final) after storage. The blood samples were then subjected to the same incubation protocol that mimics CTC-iChip processing conditions, and processed in this filter device under a constant pressure of 0.8 psi. Cold storage with tirofiban or eptifibatide enabled clog-free processing with consistent flow rate;

in comparison, no treatment ( $p = 0.0007$ ) or EDTA supplementation post-storage ( $p = 0.0276$ ) resulted in clogging and significantly decreased flow rates (one-way ANOVA followed by Tukey's posttest).

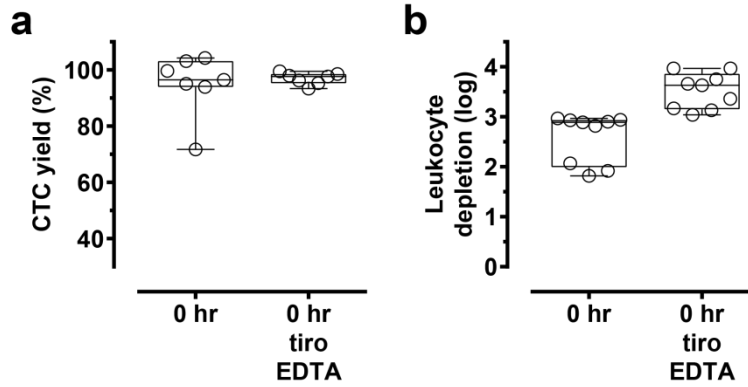

**Supplementary Figure 3.** Platelet stabilization greatly increases the purity of tumor cells isolated from fresh blood. (a) Yield of spiked tumor cells remained unchanged but (b) leukocyte depletion greatly increased with tiro-EDTA treatment ( $p = 0.0003$ ,  $t$  test). Box-and-whiskers plots show median, interquartile range, maxima, and minima.

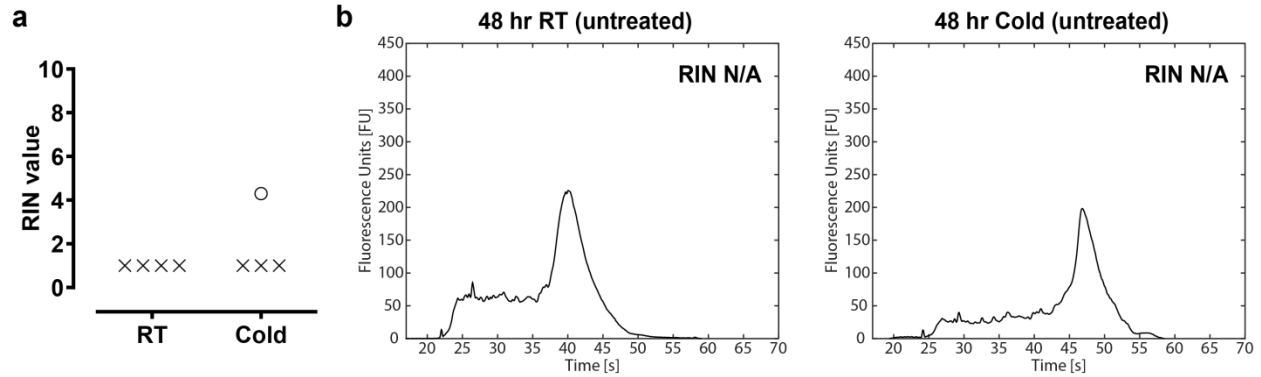

**Supplementary Figure 4.** RNA quality of patient CTCs is poor in the absence of tiro-EDTA treatment. Patient blood was stored in RT or cold for 48-72 hours without tirofiban and processed using the CTC-iChip. (a) The quality of the RNA was poor with only 1 out of 8 CTC products showing a computable RIN value (4.3; cold storage). For the rest of the CTC products, the RNA was so degraded (b) that RIN values were not available (N/A). We therefore assigned a RIN value of 1 (x; lowest possible RIN value) for easy visualization in (a). We attribute the poor RNA quality to processing failure of the CTC-iChip when tiro-EDTA is absent, due to microfluidic clogging and the resulting cellular damage, as well as the substantial increases in RBC and leukocyte contamination (Fig. 3).

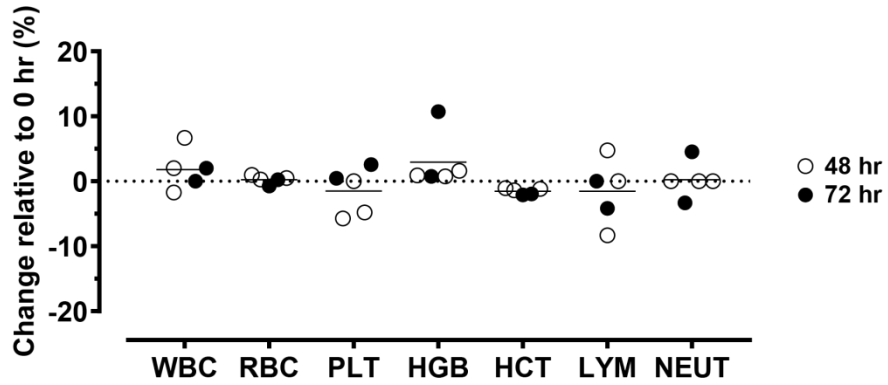

**Supplementary Figure 5.** Complete blood counts with white blood cell differential remain stable after cold preservation with tiro-EDTA treatment. Shown are percentage changes of the respective quantities relative to 0 hour. WBC, white blood cell count; RBC, red blood cell count; PLT, platelet count; HGB, hemoglobin concentration; HCT, hematocrit; LYM, lymphocyte count; NEUT, neutrophil count.

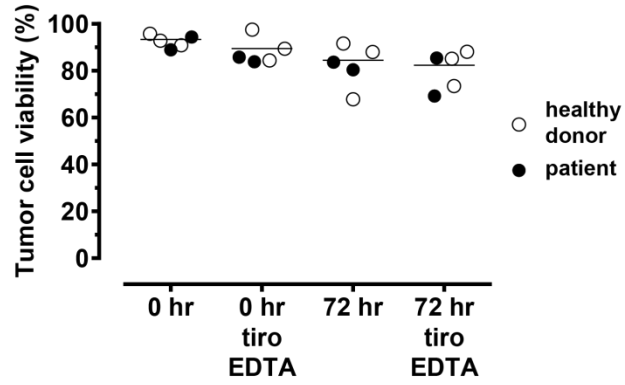

**Supplementary Figure 6.** Spiked tumor cells remain highly viable after hypothermic blood preservation. Shown are the percentages of viable (calcein+/caspase-) LNCaP cells in healthy donor or patient blood, analyzed immediately after spike or after 72 hours of hypothermic storage. The platelet stabilization treatment (tiro-EDTA) did not impact tumor cell viability.

**Supplementary Table 1. Binary concordance of cancer- and prostate-specific gene detection between fresh and preserved blood.**

|                            | AR         | ATP6V1G1   | CNPY2      | GUCY1A3    | HSD17B4    | KLK2       | KLK3 (PSA) | MCCC2      | NKX3.1     | PDLIM      | SOX4       | AR-V7<br>(by ddPCR) |                 |
|----------------------------|------------|------------|------------|------------|------------|------------|------------|------------|------------|------------|------------|---------------------|-----------------|
| Patient No.                | 0 24 48 72 | 0 24 48 72 | 0 24 48 72 | 0 24 48 72 | 0 24 48 72 | 0 24 48 72 | 0 24 48 72 | 0 24 48 72 | 0 24 48 72 | 0 24 48 72 | 0 24 48 72 | 0 24 48 72          | Concordance (%) |
| Patient #1                 | 1 1        | 1 1        | 1 1        | 1 1        | 1 1        | 1 1        | 1 1        | 1 1        | 1 1        | 1 1        | 1 1        |                     | 100.0%          |
| Patient #2.1               | 1 1        | 1 1        | 1 1        | 1 1        | 1 1        | 1 1        | 1 1        | 1 1        | 1 1        | 1 1        | 1 1        | 1 1                 | 100.0%          |
| Patient #3.1               | 1 1        | 1 1        | 1 1        | 1 1        | 1 1        | 1 1        | 1 1        | 1 1        | 1 1        | 1 1        | 1 1        |                     | 100.0%          |
| Patient #3.2               | 1 1        | 1 1        | 1 0        | 1 1        | 1 1        | 1 1        | 1 1        | 1 1        | 1 0        | 1 1        | 1 1        |                     | 81.8%           |
| Patient #3.3               | 0 1        | 1 1        | 0 1        | 1 1        | 1 1        | 0 1        | 0 1        | 1 1        | 0 0        | 1 1        | 1 1        |                     | 63.6%           |
| Patient #4                 | 1 1        | 1 1        | 1 1        | 1 1        | 1 1        | 1 1        | 1 1        | 1 1        | 1 1        | 1 1        | 1 1        |                     | 100.0%          |
| Patient #2.2               |            |            |            |            |            |            |            |            |            |            |            | 1 1                 |                 |
| Patient #5                 |            |            |            |            |            |            |            |            |            |            |            | 1 1                 |                 |
| Patient #6.1               |            |            |            |            |            |            |            |            |            |            |            | 1 1                 |                 |
| Patient #6.2               |            |            |            |            |            |            |            |            |            |            |            | 1 1                 |                 |
| Patient #7                 |            |            |            |            |            |            |            |            |            |            |            | 0 0                 |                 |
| Patient #8                 |            |            |            |            |            |            |            |            |            |            |            | 0 0                 |                 |
| Patient #9                 |            |            |            |            |            |            |            |            |            |            |            | 0 0                 |                 |
| Patient #10                |            |            |            |            |            |            |            |            |            |            |            | 1 1                 |                 |
| <b>Overall concordance</b> |            |            |            |            |            |            |            |            |            |            |            | <b>92.0%</b>        |                 |

Shown are the top 11 genes with the most stringent prostate-cancer specificity (per the GTEx Portal) detected by RNA-Seq, and AR-V7 detected using ddPCR. Genes that were detected in each experimental condition are assigned a value of “1”, while genes that were not detected are assigned a value of “0.” A concordant result is such that, for that particular gene, both the 0 hour and preserved blood share the same number notation. Binary concordance is calculated within each patient and across all patients. An overall binary concordance of 92.0% reflects the concordance across 14 blood draws and 12 genes.



**Supplementary Table 2. Amplicon sizes and sequences of forward and reverse primers for single-cell RT-qPCR used in the Fluidigm platform.**

| Gene            | Category      | Amplicon Size | Forward primer              | Reverse primer            |
|-----------------|---------------|---------------|-----------------------------|---------------------------|
| KLK3 (PSA)      | AR-on         | 71            | CACCTGCTCGGGTGATTCTG        | TGCCCCATGACGTGATACCT      |
| SORD            | AR-on         | 95            | ACCACCGTACCCCTACTGC         | AGCATCGAATCGCCACT         |
| NKX3.1          | AR-on         | 91            | AGAACGACCAGCTGAGCAC         | TAAGACCCCAAGTGCCTTTC      |
| FKBP5           | AR-on         | 69            | GGATATACGCCAACATGTTCAA      | CCATTGCTTTATTGGCCTCT      |
| ACSL3           | AR-on         | 71            | TCAGGGATACGGGCTCACT         | TGCCAGTATTGTAGTCCCACAC    |
| DBI             | AR-on         | 92            | CAGAGGAGGTTAGGCACCTTA       | TATGTGCCCCACAGTTGCTTG     |
| KLK2            | AR-on         | 82            | CTGCCCATTCCTAAAGAAG         | ACCCCTCTGGCCTGTGTCTT      |
| BRP44           | AR-on         | 75            | TTATCAGTGGCGGATGACAT        | GCTGTACCTGTAGGCAAATCTC    |
| ABHD2           | AR-on         | 74            | GCCCAACATTGAATTGACCT        | AGTTCACCATGGCTCCAAAT      |
| KRT8            | AR-on         | 91            | AGGGCTGACCGACGAGAT          | CACCACAGATGTGTCCGAGA      |
| SELENBP1        | AR-off        | 95            | ACCCAGGGAAGATCGTCTA         | ACTTGGGGTCAACATCCACAG     |
| CAMK2N1         | AR-off        | 92            | GACACCAACAACCTTCTTCGGC      | TCATCTTCAATAACAACCCGCTT   |
| PEG3            | AR-off        | 124           | CACGCAGTTCCAAATCGGGA        | CGCTGCTGGATCACTGACTC      |
| FOLH1 (PSMA)    | AR-off        | 75            | CCATTAGGGTTACCAGACAGGC      | CCCTGCATACTTGTGTGGC       |
| NIPSNAP3A       | AR-off        | 96            | CAGAGTACGGAGCACTCAACAG      | TGGGATCCTCATGGGACTTA      |
| SOX4            | AR-off        | 107           | GACCTGCTCGACCTGAACC         | CCGGGCTCGAAGTTAAATCC      |
| SEMA6A          | AR-off        | 119           | ACATTGCTGCTAGGGACCATA       | TCTGCATGTGTCTACATCGGC     |
| KRT18           | epithelial    | 86            | GTTGACCGTGAGGTTAGATGC       | GAGCCAGCTCGTCATATTGGG     |
| TACSTD1 (EpCAM) | epithelial    | 111           | CCATGTGCTGGTGTGTGAA         | TGTGTTTTAGTTCATGATGATCCA  |
| FN1             | mesenchymal   | 86            | GAAGCCGAGGTTTTAACTGC        | ACCCACTCGGTAAGTGTTC       |
| AR              | prostate      | 103           | GCCTTGCTCTCTAGCCTCAA        | GGTCGTCCACGTGTAAGTTG      |
| MYC             | stem cell     | 73            | GCTGCTTAGACGCTGGATTT        | TAACGTTGAGGGGCATCG        |
| BIRC5           | proliferation | 88            | GCCCAGTGTTCCTTCTGCTT        | AACCGGACGAATGCTTTTTTA     |
| MYBL2           | proliferation | 116           | CTTGAGCGAGTCCAAAGACTG       | AGTTGGTCAGAAGACTTCCCT     |
| CCNB1           | proliferation | 103           | ACATGGTGCACCTTCTCCT         | AGGTAATGTTGTAGAGTTGGTGTCC |
| CCND1           | proliferation | 75            | TGGAGCCCGTGA AAAAGAGC       | TCTCCTTTCATCTTAGAGGCCAC   |
| PTPRC (CD45)    | WBC           | 81            | AGTCAAAGTTATTGTTATGCTGACAGA | TGCTTTCCTTCTCCCCAGTA      |
| CD34            | WBC           | 67            | GCGCTTTGCTTGCTGAGT          | GGGTAGCAGTACCGTTGTTGT     |
| FCGR3B (CD16)   | WBC           | 107           | GGGCTTGTGGGAGTAAAAA         | ACTTGGTACCCAGGTGGAGA      |
| CD14            | WBC           | 92            | TTAGGCTCCCAGTCAACAG         | CTGCAGGGCATCTAGGGTTC      |
| FUT4 (CD15)     | WBC           | 139           | CCGCTACTACCACCAACTGAG       | CTGCGAGTTCGAAAGCCA        |
| GAPDH           | housekeeping  | 101           | ACAACCTTGGTATCGTGGAAGG      | GCCATCACGCCACAGTTTC       |
| ACTB (ActB2)    | housekeeping  | 120           | AGGCCAACCGCGAGAAG           | ACAGCCTGGATAGCAACGTACAT   |
| RPLP0           | housekeeping  | 97            | CAGATTGGCTACCCAACCTGTT      | GGAAGGTGTAATCCGTCTCCAC    |

Genes are grouped into categories (i.e., AR-on, AR-off, epithelial, mesenchymal, prostate, stem cell, proliferation, and housekeeping). Also included are leukocyte markers for exclusion.
